# Supplementary material for: N95 Filtering Facepiece Respirator Reuse, Extended Use, and Filtration Efficiency
Source: PubMed Central journal article supplement (PMC11581496; doi:10.1001/jamanetworkopen.2024.41663), 2024-10-29
Supplement: jamanetwopen-e2441663-s002.pdf [file jamanetwopen-e2441663-s002.pdf]

## Supplemental Online Content: Nonauthor Collaborators

\*First name, last name, and suffix (if applicable) are required and will appear in PubMed.

| <b>*Group Name(s): Reuse N95 Group</b>   |                   |                              |                         |                                                                       |                                                 |                                                                |                                                                                                   |
|------------------------------------------|-------------------|------------------------------|-------------------------|-----------------------------------------------------------------------|-------------------------------------------------|----------------------------------------------------------------|---------------------------------------------------------------------------------------------------|
| <b>*First Name and Middle Initial(s)</b> | <b>*Last Name</b> | <b>*Suffix (eg, Jr, III)</b> | <b>Academic Degrees</b> | <b>Institution</b>                                                    | <b>Location (city, state/province, country)</b> | <b>Role or Contribution, eg, chair, principal investigator</b> | <b>Group (if more than 1 Group listed in the byline) and/or Subgroup (eg, Steering Committee)</b> |
| Robin                                    | Kemball           |                              | MPH                     | Department of Emergency Medicine, University of California            | San Francisco, CA                               | Research Manager                                               | ReuseN95 Group                                                                                    |
| Alexis                                   | Mitchner          |                              | BA                      | Department of Emergency Medicine, University of California            | San Francisco, CA                               | Data Collection, N95 Shipment                                  | ReuseN95 Group                                                                                    |
| Angela                                   | Wong              |                              | BA                      | Department of Emergency Medicine, University of California            | San Francisco, CA                               | Data Collection, N95 Shipment                                  | ReuseN95 Group                                                                                    |
| Alex                                     | Hall              |                              | DHSc, MS, RN            | Department of Emergency Medicine, Emory University                    | Atlanta, GA                                     | Co-Investigator                                                | ReuseN95 Group                                                                                    |
| Rabbiya                                  | Iqbal             |                              | BS                      | Department of Emergency Medicine, Johns Hopkins University            | Baltimore, MD                                   | Data Collection, N95 Shipment                                  | ReuseN95 Group                                                                                    |
| Michael                                  | Kramer            |                              | BS                      | Department of Emergency Medicine, Johns Hopkins University            | Baltimore, MD                                   | Data Collection, N95 Shipment                                  | ReuseN95 Group                                                                                    |
| Kendall                                  | Maliszewski       |                              | BS                      | Department of Emergency Medicine, Johns Hopkins University            | Baltimore, MD                                   | Data Collection, N95 Shipment                                  | ReuseN95 Group                                                                                    |
| Breana                                   | McBryde           |                              | BS                      | Department of Emergency Medicine, Johns Hopkins University            | Baltimore, MD                                   | Data Collection, N95 Shipment                                  | ReuseN95 Group                                                                                    |
| Courtney M.C.                            | Jones             |                              | PhD MPH                 | Department of Emergency Medicine, University of Rochester             | Rochester, NY                                   | Co-Investigator, Data Collection, N95 Shipment                 | ReuseN95 Group                                                                                    |
| Emily                                    | Corbett-Valade    |                              | MS                      | Department of Emergency Medicine, University of Rochester             | Rochester, NY                                   | Data Collection, N95 Shipment                                  | ReuseN95 Group                                                                                    |
| Edward                                   | Castillo          |                              | PhD, MPH                | Department of Emergency Medicine, University of California            | San Diego, CA                                   | Co-Investigator                                                | ReuseN95 Group                                                                                    |
| Apoorva                                  | Maru              |                              | BS, BA                  | BerbeeWalsh Department of Emergency Medicine, University of Wisconsin | Madison, WI                                     | Data Collection, N95 Shipment                                  | ReuseN95 Group                                                                                    |
| Angela                                   | Gifford           |                              | MA                      | BerbeeWalsh Department of Emergency Medicine, University of Wisconsin | Madison, WI                                     | Data Collection, N95 Shipment                                  | ReuseN95 Group                                                                                    |
