# Supplementary material for: N95 Filtering Facepiece Respirator Reuse, Extended Use, and Filtration Efficiency
Source: PubMed Central journal article supplement (PMC11581496; doi:10.1001/jamanetworkopen.2024.41663), 2024-10-29
Supplement: jamanetwopen-e2441663-s003.pdf [file jamanetwopen-e2441663-s003.pdf]

## Data Sharing Statement

Wang. N95 Filtering Facepiece Respirator Reuse, Extended Use, and Filtration Efficiency. *JAMA Netw Open*. Published October 29, 2024. doi:10.1001/jamanetworkopen.2024.41663

### Data

**Data available:** Yes

**Data types:** Deidentified participant data, Data (not involving human participants), Data dictionary

**How to access data:** [anna.harris@ucsf.edu](mailto:anna.harris@ucsf.edu) OR [ralph.wang@ucsf.edu](mailto:ralph.wang@ucsf.edu)

**When available:** With publication

### Supporting Documents

**Document types:** None

### Additional Information

**Who can access the data:** researchers whose proposed use of data has been approved

**Types of analyses:** for projects approved by UCSF and CDC

**Mechanisms of data availability:** after approval of proposal with signed data access agreement

**Any additional restrictions:** subject to CDC and UCSF discretion
